# Supplementary material
Source: PubMed Central journal article supplement (PMC4719618)
Supplement: JVI.01392-15_zjv999091180so2.pdf [file JVI.01392-15_zjv999091180so2.pdf]

## Homer de novo Motif Results (/media/Download/K11\_motifout//)

[Known Motif Enrichment Results](#)[Gene Ontology Enrichment Results](#)If Homer is having trouble matching a motif to a known motif, try copy/pasting the matrix file into [STAMP](#)More information on motif finding results: [HOMER](#) | [Description of Results](#) | [Tips](#)

Total target sequences = 1135

Total background sequences = 48528

\* - possible false positive

| Rank | Motif                                                                               | P-value | log P-value | % of Targets | % of Background | STD (Bg STD)    | Best Match/Details                                                                                                                           |
|------|-------------------------------------------------------------------------------------|---------|-------------|--------------|-----------------|-----------------|----------------------------------------------------------------------------------------------------------------------------------------------|
| 1    |    | 1e-21   | -4.850e+01  | 4.23%        | 0.72%           | 56.3bp (63.4bp) | MA0465.1_CDXX2/Jaspar (0.766)<br><a href="#">More Information</a>   <a href="#">Similar Motifs Found</a>                                     |
| 2    |    | 1e-19   | -4.379e+01  | 3.09%        | 0.40%           | 56.8bp (74.8bp) | TEAD4 (TEA)/Tropoblast-Tead4-ChIP-Seq (GSE37350)/Homer (0.679)<br><a href="#">More Information</a>   <a href="#">Similar Motifs Found</a>    |
| 3    |    | 1e-14   | -3.372e+01  | 0.97%        | 0.02%           | 61.8bp (59.4bp) | PH0145.1_Pou2f3/Jaspar (0.650)<br><a href="#">More Information</a>   <a href="#">Similar Motifs Found</a>                                    |
| 4    |    | 1e-14   | -3.316e+01  | 2.56%        | 0.38%           | 56.0bp (63.3bp) | MA0058.2_MAX/Jaspar (0.687)<br><a href="#">More Information</a>   <a href="#">Similar Motifs Found</a>                                       |
| 5    |    | 1e-14   | -3.310e+01  | 2.29%        | 0.30%           | 54.8bp (71.2bp) | SA0002.1_at_AC_acceptor/Jaspar (0.650)<br><a href="#">More Information</a>   <a href="#">Similar Motifs Found</a>                            |
| 6    |   | 1e-14   | -3.257e+01  | 1.59%        | 0.12%           | 46.5bp (64.3bp) | Gfilb (Zf)/HPC7-Gfilb-ChIP-Seq (GSE22178)/Homer (0.657)<br><a href="#">More Information</a>   <a href="#">Similar Motifs Found</a>           |
| 7    |  | 1e-14   | -3.228e+01  | 3.53%        | 0.78%           | 51.2bp (62.4bp) | SD0003.1_at_AC_acceptor/Jaspar (0.650)<br><a href="#">More Information</a>   <a href="#">Similar Motifs Found</a>                            |
| 8    |  | 1e-13   | -3.187e+01  | 1.68%        | 0.14%           | 49.0bp (70.5bp) | Smad3 (MAD)/NPC-Smad3-ChIP-Seq (GSE36673)/Homer (0.594)<br><a href="#">More Information</a>   <a href="#">Similar Motifs Found</a>           |
| 9    |  | 1e-13   | -3.132e+01  | 2.12%        | 0.27%           | 58.0bp (75.6bp) | NF1-halbsite (CTF)/LNCaP-NF1-ChIP-Seq (Unpublished)/Homer (0.633)<br><a href="#">More Information</a>   <a href="#">Similar Motifs Found</a> |
| 10   |  | 1e-13   | -3.001e+01  | 0.62%        | 0.01%           | 44.9bp (82.4bp) | PB0138.1_Irf4_2/Jaspar (0.617)<br><a href="#">More Information</a>   <a href="#">Similar Motifs Found</a>                                    |
| 11   |  | 1e-12   | -2.765e+01  | 1.50%        | 0.14%           | 66.7bp (64.0bp) | PB0207.1_Zic3_2/Jaspar (0.678)<br><a href="#">More Information</a>   <a href="#">Similar Motifs Found</a>                                    |
| 12 * |  | 1e-11   | -2.731e+01  | 0.88%        | 0.03%           | 52.9bp (32.4bp) | MA0157.1_FOX03/Jaspar (0.552)<br><a href="#">More Information</a>   <a href="#">Similar Motifs Found</a>                                     |
| 13 * |  | 1e-11   | -2.679e+01  | 1.85%        | 0.24%           | 53.5bp (60.3bp) | PB0032.1_IRC900814_1/Jaspar (0.707)<br><a href="#">More Information</a>   <a href="#">Similar Motifs Found</a>                               |
| 14 * |  | 1e-10   | -2.442e+01  | 2.47%        | 0.51%           | 52.2bp (65.3bp) | MA0119.1_TLX1::NFIC/Jaspar (0.703)<br><a href="#">More Information</a>   <a href="#">Similar Motifs Found</a>                                |
| 15 * |  | 1e-10   | -2.390e+01  | 1.68%        | 0.23%           | 39.5bp (73.4bp) | POL007.1_BRED/Jaspar (0.636)<br><a href="#">More Information</a>   <a href="#">Similar Motifs Found</a>                                      |
| 16 * |  | 1e-9    | -2.166e+01  | 10.93%       | 6.09%           | 52.7bp (54.3bp) | Rbpj1 (?)/Panc1-Rbpj1-ChIP-Seq (GSE47459)/Homer (0.699)<br><a href="#">More Information</a>   <a href="#">Similar Motifs Found</a>           |
| 17 * |  | 1e-9    | -2.113e+01  | 2.73%        | 0.72%           | 54.5bp (69.9bp) | Foxh1 (Forkhead)/hESC-FOXH1-ChIP-Seq (GSE29422)/Homer (0.628)<br><a href="#">More Information</a>   <a href="#">Similar Motifs Found</a>     |

|      |                                                                                     |      |            |        |        |                    |                                                                     |                                                                         |                       |
|------|-------------------------------------------------------------------------------------|------|------------|--------|--------|--------------------|---------------------------------------------------------------------|-------------------------------------------------------------------------|-----------------------|
|      |     |      |            |        |        |                    |                                                                     |                                                                         | <a href="#">Found</a> |
| 18 * |    | 1e-9 | -2.086e+01 | 12.26% | 7.19%  | 54.8bp<br>(61.5bp) | CRX (Homeobox) / Retina-Crx-ChIP-Seq (GSE20012) / Homer (0.780)     | <a href="#">More Information</a>   <a href="#">Similar Motifs Found</a> |                       |
| 19 * |    | 1e-8 | -2.062e+01 | 1.06%  | 0.09%  | 38.0bp<br>(67.8bp) | MF0011.1_HMG_class/Jaspar (0.645)                                   | <a href="#">More Information</a>   <a href="#">Similar Motifs Found</a> |                       |
| 20 * |    | 1e-8 | -2.034e+01 | 16.14% | 10.35% | 54.7bp<br>(57.7bp) | NFkB-p65-Rel (RHD) / LPS-exp (GSE23622) / Homer (0.598)             | <a href="#">More Information</a>   <a href="#">Similar Motifs Found</a> |                       |
| 21 * |    | 1e-7 | -1.834e+01 | 0.71%  | 0.04%  | 48.5bp<br>(36.6bp) | POL002.1_INR/Jaspar (0.648)                                         | <a href="#">More Information</a>   <a href="#">Similar Motifs Found</a> |                       |
| 22 * |    | 1e-7 | -1.822e+01 | 0.35%  | 0.00%  | 52.4bp<br>(0.0bp)  | ZFX (Zf) / mES-Zfx-ChIP-Seq (GSE11431) / Homer (0.656)              | <a href="#">More Information</a>   <a href="#">Similar Motifs Found</a> |                       |
| 23 * |    | 1e-7 | -1.729e+01 | 7.32%  | 3.83%  | 55.0bp<br>(59.5bp) | PB0144.1_Lef1_2/Jaspar (0.678)                                      | <a href="#">More Information</a>   <a href="#">Similar Motifs Found</a> |                       |
| 24 * |    | 1e-7 | -1.671e+01 | 0.44%  | 0.01%  | 53.0bp<br>(32.4bp) | PB0163.1_Six6_2/Jaspar (0.652)                                      | <a href="#">More Information</a>   <a href="#">Similar Motifs Found</a> |                       |
| 25 * |   | 1e-6 | -1.604e+01 | 38.36% | 31.06% | 57.2bp<br>(61.0bp) | Rbpj1 (?) / Panc1-Rbpj1-ChIP-Seq (GSE47459) / Homer (0.686)         | <a href="#">More Information</a>   <a href="#">Similar Motifs Found</a> |                       |
| 26 * |  | 1e-6 | -1.560e+01 | 1.32%  | 0.24%  | 58.8bp<br>(58.3bp) | GLI3 (Zf) / GLI3-ChIP-Chip (GSE11077) / Homer (0.703)               | <a href="#">More Information</a>   <a href="#">Similar Motifs Found</a> |                       |
| 27 * |  | 1e-6 | -1.558e+01 | 1.85%  | 0.47%  | 49.3bp<br>(56.3bp) | MF0009.1_TRP (MYB) _class/Jaspar (0.686)                            | <a href="#">More Information</a>   <a href="#">Similar Motifs Found</a> |                       |
| 28 * |  | 1e-6 | -1.546e+01 | 0.35%  | 0.01%  | 58.1bp<br>(47.1bp) | PH0084.1_Irx3_2/Jaspar (0.682)                                      | <a href="#">More Information</a>   <a href="#">Similar Motifs Found</a> |                       |
| 29 * |  | 1e-6 | -1.426e+01 | 0.62%  | 0.04%  | 53.6bp<br>(54.4bp) | CEBP:AP1 (bZIP) / ThioMac-CEBPb-ChIP-Seq (GSE21512) / Homer (0.655) | <a href="#">More Information</a>   <a href="#">Similar Motifs Found</a> |                       |
| 30 * |  | 1e-6 | -1.422e+01 | 6.35%  | 3.41%  | 54.8bp<br>(60.8bp) | TEAD (TEA) / Fibroblast-PU.1-ChIP-Seq (Unpublished) / Homer (0.771) | <a href="#">More Information</a>   <a href="#">Similar Motifs Found</a> |                       |
| 31 * |  | 1e-6 | -1.406e+01 | 7.05%  | 3.95%  | 57.1bp<br>(60.0bp) | MA0081.1_SPIB/Jaspar (0.748)                                        | <a href="#">More Information</a>   <a href="#">Similar Motifs Found</a> |                       |
| 32 * |  | 1e-6 | -1.386e+01 | 0.35%  | 0.01%  | 56.5bp<br>(44.2bp) | PB0098.1_Zfp410_1/Jaspar (0.585)                                    | <a href="#">More Information</a>   <a href="#">Similar Motifs Found</a> |                       |
| 33 * |  | 1e-5 | -1.312e+01 | 4.32%  | 2.07%  | 50.6bp<br>(60.8bp) | PB0094.1_Zfp128_1/Jaspar (0.653)                                    | <a href="#">More Information</a>   <a href="#">Similar Motifs Found</a> |                       |
| 34 * |  | 1e-4 | -1.101e+01 | 0.26%  | 0.01%  | 53.6bp<br>(12.1bp) | MA0111.1_Spz1/Jaspar (0.672)                                        | <a href="#">More Information</a>   <a href="#">Similar Motifs Found</a> |                       |
| 35 * |  | 1e-4 | -1.032e+01 | 6.26%  | 3.77%  | 50.6bp<br>(55.5bp) | MA0056.1_MZF1_1-4/Jaspar (0.803)                                    | <a href="#">More Information</a>   <a href="#">Similar Motifs Found</a> |                       |

|      |                                                                                   |      |            |       |       |                    |                                                                                                                                      |
|------|-----------------------------------------------------------------------------------|------|------------|-------|-------|--------------------|--------------------------------------------------------------------------------------------------------------------------------------|
| 36 * |   | 1e-4 | -9.727e+00 | 0.44% | 0.04% | 55.8bp<br>(41.7bp) | PB0107.1_Asc12_2/Jaspar (0.736)<br><a href="#">More Information</a>   <a href="#">Similar Motifs Found</a>                           |
| 37 * |  | 1e-4 | -9.727e+00 | 0.44% | 0.04% | 52.7bp<br>(66.8bp) | SPDEF (ETS)/VCaP-SPDEF-ChIP-Seq (SRA014231)/Homer (0.785)<br><a href="#">More Information</a>   <a href="#">Similar Motifs Found</a> |
| 38 * |  | 1e-3 | -8.217e+00 | 0.18% | 0.00% | 60.3bp<br>(0.0bp)  | MF0002.1_bZIP_CREB/G-box-like_subclass/Jaspar (0.629)<br><a href="#">More Information</a>   <a href="#">Similar Motifs Found</a>     |
| 39 * |  | 1e-2 | -6.051e+00 | 0.18% | 0.01% | 61.2bp<br>(76.9bp) | PB0050.1_Osr1_1/Jaspar (0.691)<br><a href="#">More Information</a>   <a href="#">Similar Motifs Found</a>                            |
| 40 * |  | 1e-1 | -3.765e+00 | 0.09% | 0.00% | 61.5bp<br>(9.5bp)  | SD0001.1_at_AC_acceptor/Jaspar (0.629)<br><a href="#">More Information</a>   <a href="#">Similar Motifs Found</a>                    |
| 41 * |  | 1e-1 | -3.765e+00 | 0.09% | 0.00% | 58.1bp<br>(0.0bp)  | RUNX2 (Runt)/PCa-RUNX2-ChIP-Seq (GSE33889)/Homer (0.701)<br><a href="#">More Information</a>   <a href="#">Similar Motifs Found</a>  |
