# Supplementary material
Source: PubMed Central journal article supplement (PMC4719618)
Supplement: JVI.01392-15_zjv999091180so4.pdf [file JVI.01392-15_zjv999091180so4.pdf]

## Supplementary Figures

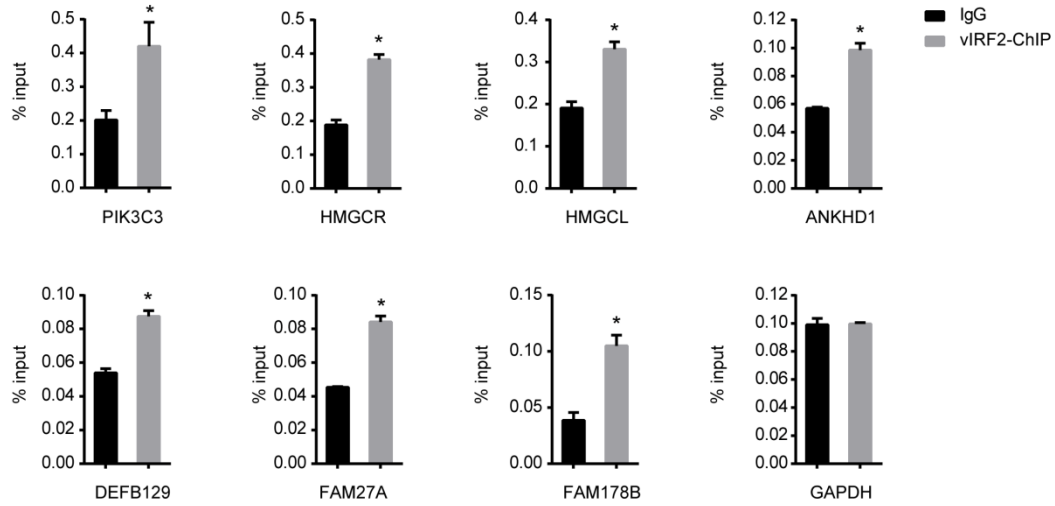

**Fig. S1.** Binding of vIRF2 to its target promoters were validated by ChIP-qPCR. Data were shown as mean  $\pm$  s.e.m., n=3. \* p<0.05

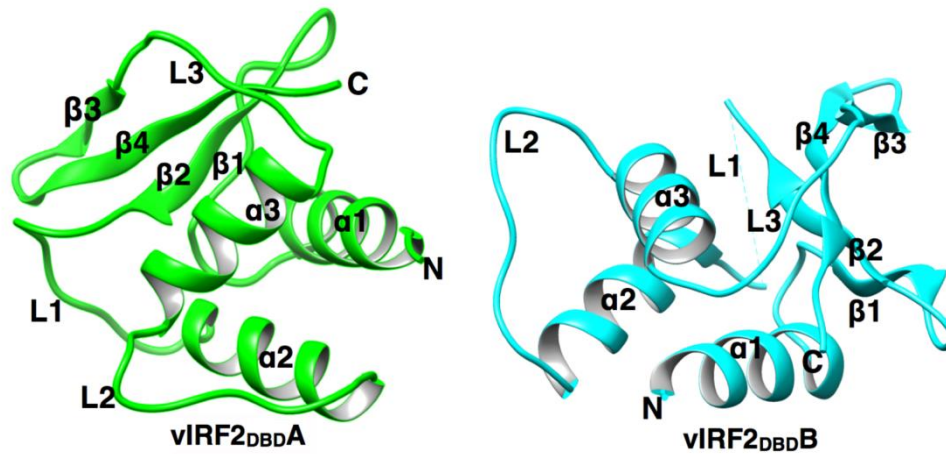

**Fig. S2.** Interaction of vIRF2<sub>DBD</sub> with consensus vIRF2-binding motifs *in vitro*. (A) Validation of direct vIRF2-DNA binding by EMSA using vIRF2<sub>DBD</sub> and the DNA probe1 (representing LANA-binding motif 1), probe 2 (representing vIRF2-binding motif 1) and probe 3 (vIRF2-binding motif 2). vIRF2<sub>DBD</sub> induced significant gel shift of probe 2 or probe 3 in a dose dependent manner, but not of probe 1. (B) Validation of direct vIRF2-DNA binding by EMSA using vIRF2<sub>DBD</sub> and the DNA probe representing vIRF2-binding motif 2. Wt vIRF2<sub>DBD</sub> induced significant gel shift of the probe in a dose dependent manner, however R82A, R85A or R82A/ R85A mutant induced much weaker gel shifts compared to wild type vIRF2<sub>DBD</sub>.

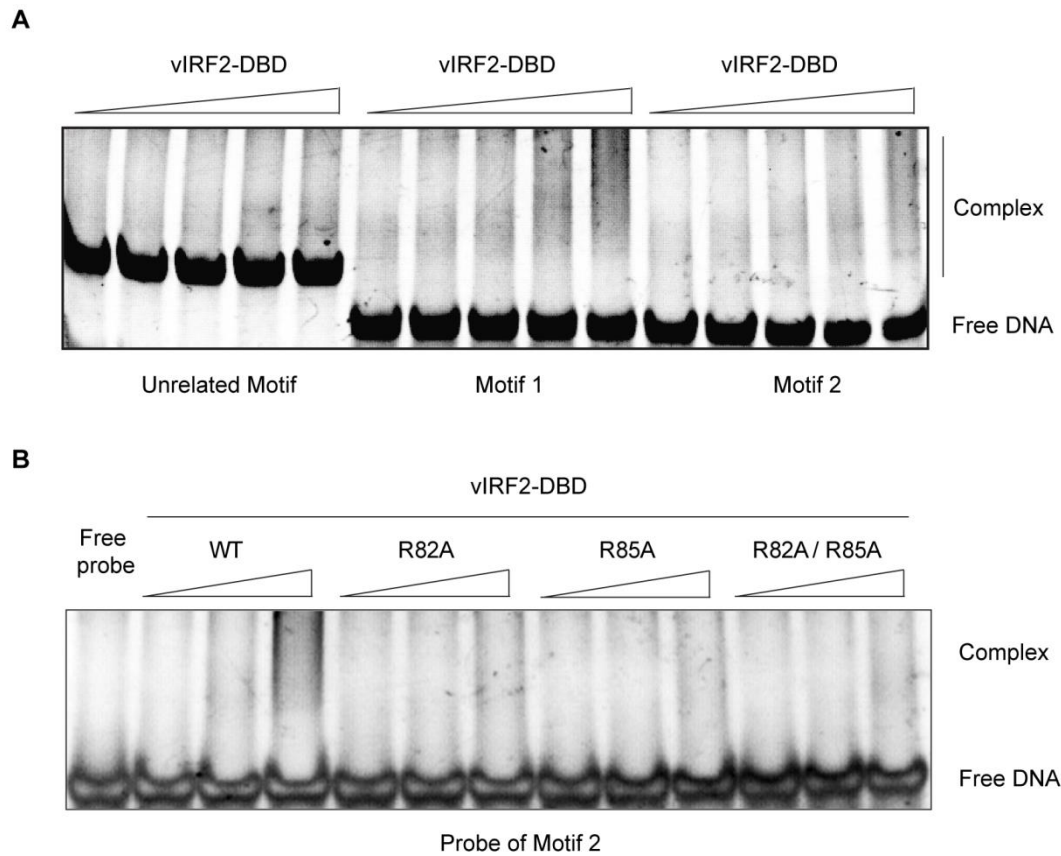

**Fig. S3.** Overall view of vIRF2<sub>DBD</sub> structure. There were two molecules in the asymmetric unit, named vIRF2<sub>DBD</sub>A (green) and vIRF2<sub>DBD</sub>B (cyan), respectively. The residues Arg42- Gly50 without electronic density were connected by a dashed line.

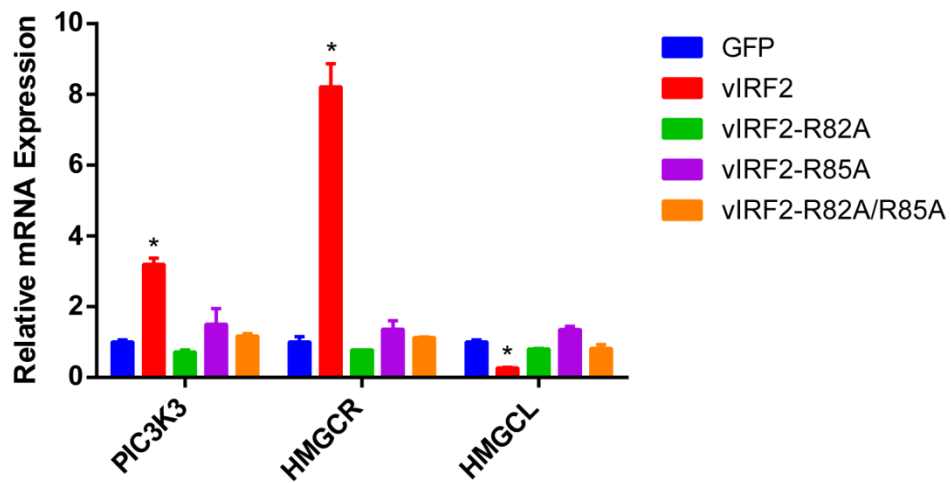

**Fig. S4.** mRNA level of *PIK3C3* and *HMGCRC* were significantly up-regulated, while *HMGCCL* was significantly down-regulated by vIRF2 expression, however, R82A, R85A or R82A/ R85A mutants lost their function in transcription regulation of these three genes. The mRNA level was measured by qRT-PCR. Data were shown as mean  $\pm$  s.e.m., n=3. \* p<0.05
